# **Synthetic miR-16-5p does not act as a reverse transcriptase co-factor to enhance detection of small RNA**

Melissa A. McAlexander<sup>1</sup> and Kenneth W. Witwer<sup>1,2</sup>

<sup>1</sup>Department of Molecular and Comparative Pathobiology

<sup>2</sup>Department of Neurology

The Johns Hopkins University School of Medicine

733 N. Broadway

Miller Research Building Rm 829

Baltimore, MD 21205

USA

\* Corresponding Author

Email: kwitwer1@jhmi.edu

Phone: 1-410-955-9770

Fax: 1-410-955-9823

## **ABSTRACT**

Failure to detect low-abundance microRNAs (miRNAs), for example, in circulating plasma, may occur for a variety of reasons, including presence of enzyme inhibitors. Recently, we received the unusual but intriguing suggestion that miR-16-5p acts as a co-factor of reverse transcriptases, facilitating more efficient reverse transcription of miRNAs and thus enhanced detection of low-abundance miRNAs. We tested this hypothesis by incubating reverse transcriptase with several concentrations of synthetic miR-16-5p and then performing stem-loop RT-qPCR with serial dilutions of miRNA osa-MIR168a. Our results do not support a role for miR-16 as a co-factor of reverse transcriptase.

## **KEYWORDS**

miR-16, co-factor, miRNA, xenomiR, qPCR, reverse transcriptase

## INTRODUCTION

Previously, we reported a lack of quantitative PCR (qPCR)-based detection of plant miRNAs, or xenomiRs, in blood of primates that received a plant miRNA-replete dietary substance [1]. Technical controls and digital droplet PCR revealed that any late amplification signal was consistent with non-specific amplification, while synthetic standard curves demonstrated assay sensitivity down to tens or even single digits of copies. These findings were not surprising, since dietary RNA is labile, is exposed to a series of harsh environments in the alimentary canal, and has no well characterized routes of uptake into and distribution within mammals [2–4]. Other groups have reported similar results [5–9] in humans and rodents using a variety of qPCR and sequencing methods.

A colleague who expressed skepticism at our results because of a previous report of xenomiR detection [10] presented an intriguing hypothesis. Specifically, low-level exogenous plant miRNAs in mammals were not detected because the reverse transcriptase we used [acquired from Applied Biosystems by Thermo Fisher (ABI)], required pre-incubation with a small RNA co-factor for optimal activity:

*“By the way, I guess that you are all using ABI reverse-transcriptase (RTase).*

*If so, I would suggest that (you) mix synthetic mi(R)-16 with RT, incubate for 30min at 16 C, then use the mixture to do your qRT-PCR for detecting low level(s) of miRNA (endogenous and exogenous plant miRNA), even low level(s) of mRNA.”*

Although no explanation was given as to why miR-16 might be necessary, we were interested in determining whether this simple additional step prior to reverse transcription and qPCR would lend even more sensitivity to already highly sensitive assays. Therefore, we tested the hypothesis that miR-16-5p acts as a co-factor for reverse transcriptase enzyme.

## MATERIALS AND METHODS

Synthetic oligonucleotides corresponding to hsa-miR-16-5p (sequence UAGCAGCACGUAAAUAUUGGCG, also referred to as “miR-16” or “hsa-miR-16”) and osa-MIR168a-5p (UCGCUUGGUGCAGAUCCGGGAC) were ordered from Integrated DNA Technologies (IDT). RT enzyme (MultiScribe™ RT enzyme, Applied Biosystems/Life Technologies, now Thermo Fisher) was pre-incubated for 30 minutes at 16°C with synthetic miR-16 at four concentrations: high (400 nM), mid (4 nM), low (400 fM), and none. A dilution series of synthetic osa-MIR168a standard was prepared, with dilutions separated by two-fold (dilutions 1 and 2) and four-fold (dilutions 3-6). Following RT reaction, dilution per manufacturer’s instructions, and preparation of the second-step amplification reactions, there were an estimated 10,000, 5,000, 1,250, 80, and 20 copies of synthetic osa-MIR168a per qPCR reaction. Two-step RT-qPCR assays were from Applied Biosystems/Thermo Fisher under Catalog number # 4427975 (inventoried miRNA assays): hsa-miR-16-5p (000391) and osa-MIR168a-5p (007594\_mat). RT and qPCR steps were performed as described previously [11] with a CFX96 qPCR system (BioRad).

## RESULTS

When MIR168a was measured in dilution series, as expected, cycle of quantitation (Cq) values for the first two standard dilutions were separated by approximately one cycle, while Cq for the remaining dilutions were separated by approximately two cycles (Figure 1). The greatest variability was observed at the highest standard dilution, also as expected. At the highest concentration of synthetic miR-16, slightly later amplification (by around half a cycle on average for the first five standard dilutions) was observed. miR-16 was also assayed to confirm the presence of the presumed cofactor (Figure 1).

## **DISCUSSION**

These results do not support the hypothesis that synthetic miR-16 acts as a reverse transcriptase co-factor to enhance reverse transcription and subsequent detection of miRNA such as plant miRNA osa-MIR168a in standard stem-loop reverse transcription/hydrolysis probe qPCR assays. Indeed, at the highest pre-incubation concentration of miR-16, there was a decrease in sensitivity. The performance of some TaqMan assays (including, in our hands, the osa-MIR168a and ath-MIR156a assays), may leave only limited room for improvement, and that within a low concentration range that for most source materials would have no relevance for canonical miRNA-mediated regulation: hundreds to thousands of copies per cell [12]. Although one could postulate that miRNAs that we did not test here would be better reverse-transcribed in the presence of miR-16, it is unclear how this effect would be mediated, and we do not plan to investigate this hypothesis further.

## **AUTHOR CONTRIBUTIONS**

KWW planned the study. MAM performed the experiments. KWW and MAM analyzed the data. KWW wrote the manuscript, and MAM read and approved the manuscript.

## **ACKNOWLEDGMENTS**

The authors thank members of the Witwer lab for assistance and helpful discussions, and the unnamed colleague for the interesting suggestion of hsa-miR-16-5p as a reverse transcriptase co-factor.

## REFERENCES

1. Witwer KW, McAlexander MA, Queen SE, Adams RJ (2013) Real-time quantitative PCR and droplet digital PCR for plant miRNAs in mammalian blood provide little evidence for general uptake of dietary miRNAs: Limited evidence for general uptake of dietary plant xenomiRs. *RNA Biol* 10:1080–1086. doi: 10.4161/rna.2524625246 [pii]
2. Petrick JS, Brower-Toland B, Jackson AL, Kier LD (2013) Safety assessment of food and feed from biotechnology-derived crops employing RNA-mediated gene regulation to achieve desired traits: A scientific review. *Regul Toxicol Pharmacol* 66:167–176. doi: S0273-2300(13)00046-9 [pii]10.1016/j.yrtph.2013.03.008
3. Sherman JH, Munyikwa T, Chan SY, et al. (2015) RNAi technologies in agricultural biotechnology: The Toxicology Forum 40th Annual Summer Meeting. *Regul Toxicol Pharmacol* 73:671–80. doi: 10.1016/j.yrtph.2015.09.001
4. Witwer KW, Hirschi KD (2014) Transfer and functional consequences of dietary microRNAs in vertebrates: Concepts in search of corroboration. *BioEssays* 36:394–406.
5. Wang K, Li H, Yuan Y, et al. (2012) The complex exogenous RNA spectra in human plasma: an interface with human gut biota? *PLoS One* 7:e51009. doi: 10.1371/journal.pone.0051009PONE-D-12-13998 [pii]
6. Snow JW, Hale AE, Isaacs SK, et al. (2013) Ineffective delivery of diet-derived microRNAs to recipient animal organisms. *RNA Biol* 10:1107–1116. doi: 10.4161/rna.2490924909 [pii]
7. Baier SR, Nguyen C, Xie F, et al. (2014) MicroRNAs Are Absorbed in Biologically Meaningful Amounts from Nutritionally Relevant Doses of Cow Milk and Affect Gene Expression in Peripheral Blood Mononuclear Cells, HEK-293 Kidney Cell Cultures, and Mouse Livers. *J Nutr*. doi: jn.114.196436 [pii]10.3945/jn.114.196436

8. Micó V, Martín R, Lasunción MA, et al. (2016) Unsuccessful Detection of Plant MicroRNAs in Beer, Extra Virgin Olive Oil and Human Plasma After an Acute Ingestion of Extra Virgin Olive Oil. *Plant Foods Hum Nutr* 71:102–8. doi: 10.1007/s11130-016-0534-9
9. Dickinson B, Zhang Y, Petrick JS, et al. (2013) Lack of detectable oral bioavailability of plant microRNAs after feeding in mice. *Nat Biotechnol* 31:965–967. doi: 10.1038/nbt.2737nbt.2737 [pii]
10. Zhang L, Hou D, Chen X, et al. (2012) Exogenous plant MIR168a specifically targets mammalian LDLRAP1: evidence of cross-kingdom regulation by microRNA. *Cell Res* 22:107–126. doi: 10.1038/cr.2011.158cr2011158 [pii]
11. McAlexander MA, Phillips MJ, Witwer KW (2013) Comparison of methods for miRNA extraction from plasma and quantitative recovery of RNA from cerebrospinal fluid. *Front Genet* 4:83. doi: 10.3389/fgene.2013.00083
12. Mullokandov G, Baccarini A, Ruza A, et al. (2012) High-throughput assessment of microRNA activity and function using microRNA sensor and decoy libraries. *Nat Methods* 9:840–846. doi: 10.1038/nmeth.2078nmeth.2078 [pii]

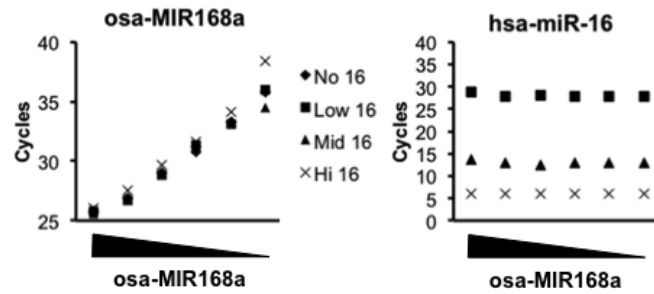

**Figure 1. No enhancing effect of miR-16-5p as a reverse transcriptase co-factor.**

Synthetic miR-16-5p was incubated with reverse transcriptase (Thermo Fisher) for 30 minutes at 16°C at the following concentrations: none ("No 16), 400 fM ("Low 16), 4 nM (Mid 16), and 400 nM (Hi 16). Reverse transcription reactions were performed to detect serially diluted synthetic osa-MIR168a (left) or hsa-miR-16-5p (right) in the same reactions.
